# Supplementary material for: Development and Effect Evaluation of an Action-Oriented Interdisciplinary Weaning Protocol for Cuffed Tracheostomy Tubes in Patients with Acquired Brain Injury
Source: MDPI journal article supplement (doi:10.3390/healthcare12040480), 2024-02-16
Supplement: s1 [file s1]

Supplementary Materials

Table S1. Hazard Ratio for pneumonia before and after implementation of the interdisciplinary weaning protocol

| Variable         | Adjusted HR (95%CI) |
|------------------|---------------------|
| Weaning protocol |                     |
| • Following IWP  | 0.899 (0.583;1.385) |
| • Before IWP     | Ref.                |
| Sex              |                     |
| • Men            | 2.377 (1.373;4.116) |
| • Women          | Ref.                |

Abbreviations: IWP = Interdisciplinary weaning protocol; HR = Hazard ratio. Right censored 120-days of hospitalization or at discharge, whichever came first.
